# Supplementary material
Source: publisher figshare collection journal article supplement (https://tandf.figshare.com/ndownloader/files/21375348)
Supplement: Supplementary file 1 [file 21375348]

Appendix:

Table S1. Search strategy for the Pubmed/Medline database

| **Search** | **Query** |
| --- | --- |
| #5 | Search (Mycobacterium avium Complex [Title/Abstract]) OR Mycobacterium avium-intracellulare Complex [Title/Abstract]) OR Mycobacterium avium-intracellulare[Title/Abstract]) OR Battey Bacillus[Title/Abstract]) OR Mycobacterium intracellulare[Title/Abstract]) OR MAC[Title/Abstract])) AND ((Macrolides[MeSH Terms]) OR Aminoglycosides[MeSH Terms]) |
| #4 | Search (Macrolides [MeSH Terms]) OR Aminoglycosides [MeSH Terms] |
| #3 | Search Macrolides [MeSH Terms] |
| #2 | Search Aminoglycosides [MeSH Terms] |
| #1 | Search (Mycobacterium avium Complex [Title/Abstract]) OR Mycobacterium avium-intracellulare Complex [Title/Abstract]) OR Mycobacterium avium-intracellulare[Title/Abstract]) OR Battey Bacillus[Title/Abstract]) OR Mycobacterium intracellulare[Title/Abstract]) OR MAC[Title/Abstract] |
